# Supplementary material for: Astrocyte biomarker signatures of amyloid-β and tau pathologies in Alzheimer’s disease
Source: Springer Nature journal article supplement (doi:10.1038/s41380-022-01716-2), 2022-08-10
Supplement: MOESM1 [file 41380_2022_1716_MOESM1_ESM.pdf]

## **Supplementary Information**

Article: “Astrocyte biomarker signatures of amyloid- $\beta$  and tau pathologies in Alzheimer’s disease”

Ferrari-Souza *et al.*

**Supplementary Methods.** MRI and PET acquisition and processing.

**Supplementary Figure 1.** Flowchart of included participants.

**Supplementary Figure 2.** A $\beta$ -PET and tau-PET SUVR average and SD maps.

**Supplementary Figure 3.** Correlation between reactive astrocyte biomarkers.

**Supplementary Figure 4.** CSF YKL-40 levels across AT groups, including A-T+ individuals.

**Supplementary Figure 5.** Voxel-wise linear regression results uncorrected for multiple comparisons correction.

**Supplementary Figure 6.** Overlap between the regions showing a significant association of CSF GFAP and YKL-40 with A $\beta$ -PET and tau-PET, respectively.

**Supplementary Figure 7.** GFAP and YKL-40 are associated with CSF inflammatory makers.

**Supplementary Table 1.** Time differences between imaging modalities.

**Supplementary Table 2.** Analysis testing whether an interaction between A $\beta$ -PET and tau-PET values was differentially associated with the CDR score in the right and left cerebral hemispheres.

**Supplementary Table 3.** Analysis testing whether an interaction between A $\beta$ -PET and tau-PET values was differentially associated with memory and executive composite scores in the right and left cerebral hemispheres.

**Supplementary Table 4.** Associations of CSF GFAP and YKL-40 with neocortical A $\beta$ -PET and temporal meta-ROI tau-PET.

**Supplementary Table 5.** Sensitivity analyses testing the associations of A $\beta$ -PET and tau-PET with reactive astrocyte biomarkers excluding individuals with a time lag higher than 3 months between imaging and CSF collection.

**Supplementary Table 6.** Structural equation model coefficients and associated statistics for Figure 3A.

**Supplementary Table 7.** Structural equation model coefficients and associated statistics for Figure 3B.

**Supplementary Table 8.** Abbreviations of inflammation-related proteins.

**Supplementary Table 9.** Demographics of the subset of individuals with available CSF inflammation-related proteins.

**Supplementary Table 10.** Comparison of demographic information between the whole sample and the subsample with available CSF inflammation-related proteins.

Abbreviations: AD = Alzheimer's disease; ADAD = autosomal dominant Alzheimer's disease; ADNI = Alzheimer's Disease Neuroimaging Initiative; *APOE*  $\epsilon 4$  = Apolipoprotein E  $\epsilon 4$ ; A $\beta$  = amyloid- $\beta$ ; CSF = cerebrospinal fluid; CI = cognitively impaired; CU = cognitively unimpaired; GFAP = glial fibrillary acidic protein; MCI = mild cognitive impairment; MMSE = Mini-Mental State Examination; MPRAGE = magnetization prepared rapid acquisition gradient echo; MNI = Montreal Neurological Institute; MRI = magnetic resonance imaging; PET = positron emission tomography; RFT = random field theory; SD = standard deviation; SUVR = standardized uptake value ratio; YKL-40 = chitinase-3-like protein 1.

### **Supplementary Methods. MRI and PET acquisition and processing.**

Structural MRI was acquired at the MNI using a 3-T Siemens Magnetom using a standard head coil. We used the MPRAGE MRI (TR: 2300 ms, TE: 2.96ms) sequence to obtain high-resolution structural images of the whole brain (9° flip angle, coronal orientation perpendicular to the double spin echo sequence, 1x1 mm<sup>2</sup> in-plane resolution of 1 mm slab thickness). Then, the Statistical Parametric Mapping 12 segmentation tool was used to segment anatomical images into probabilistic grey matter and white matter maps. Each grey matter probability map was then non-linearly registered (with modulation) to the ADNI template using DARTEL [1] and voxel values were modulated by multiplying them by the Jacobian determinants derived from the spatial normalization step [2]. MRI images were smoothed using a Gaussian kernel of full width half maximum of 8 mm. Lastly, we visually inspected all images to ensure proper alignment to the ADNI template. A $\beta$ -PET ([<sup>18</sup>F]AZD4694; 40–70 min post-injection) and tau-PET ([<sup>18</sup>F]MK-6240; 90–110 min post-injection) scans were acquired on a Siemens High Resolution Research Tomograph. A $\beta$ -PET and tau-PET scans were reconstructed using the ordered subset expectation maximization algorithm on a 4D volume with three frames (3 x 600 seconds) and four frames (4 x 300 seconds), respectively [3]. Then, attenuation correction was performed using a 6-minute transmission scan with a rotating <sup>137</sup>Cs point source. Furthermore, PET images were corrected for motion, dead time, decay, and scattered and random coincidences. Following an in-house pipeline, T1-weighted MRI data was corrected for non-uniformity and field distortion. Subsequently, linear co-registration and non-linear spatial normalization for the MNI template was performed through linear and non-linear transformation in two main steps: (i) PET registration to the correspondent T1-weighted MRI, and (ii) T1-weighted MRI registration to the MNI reference space. PET images were spatially smoothed to achieve a final resolution of 8 mm full width at half-maximum width. SUVRs were calculated using the whole cerebellum grey matter reference region for [<sup>18</sup>F]AZD4694 A $\beta$ -PET [4] and using the inferior cerebellum grey matter as reference region for [<sup>18</sup>F]MK-6240 tau-PET [5].

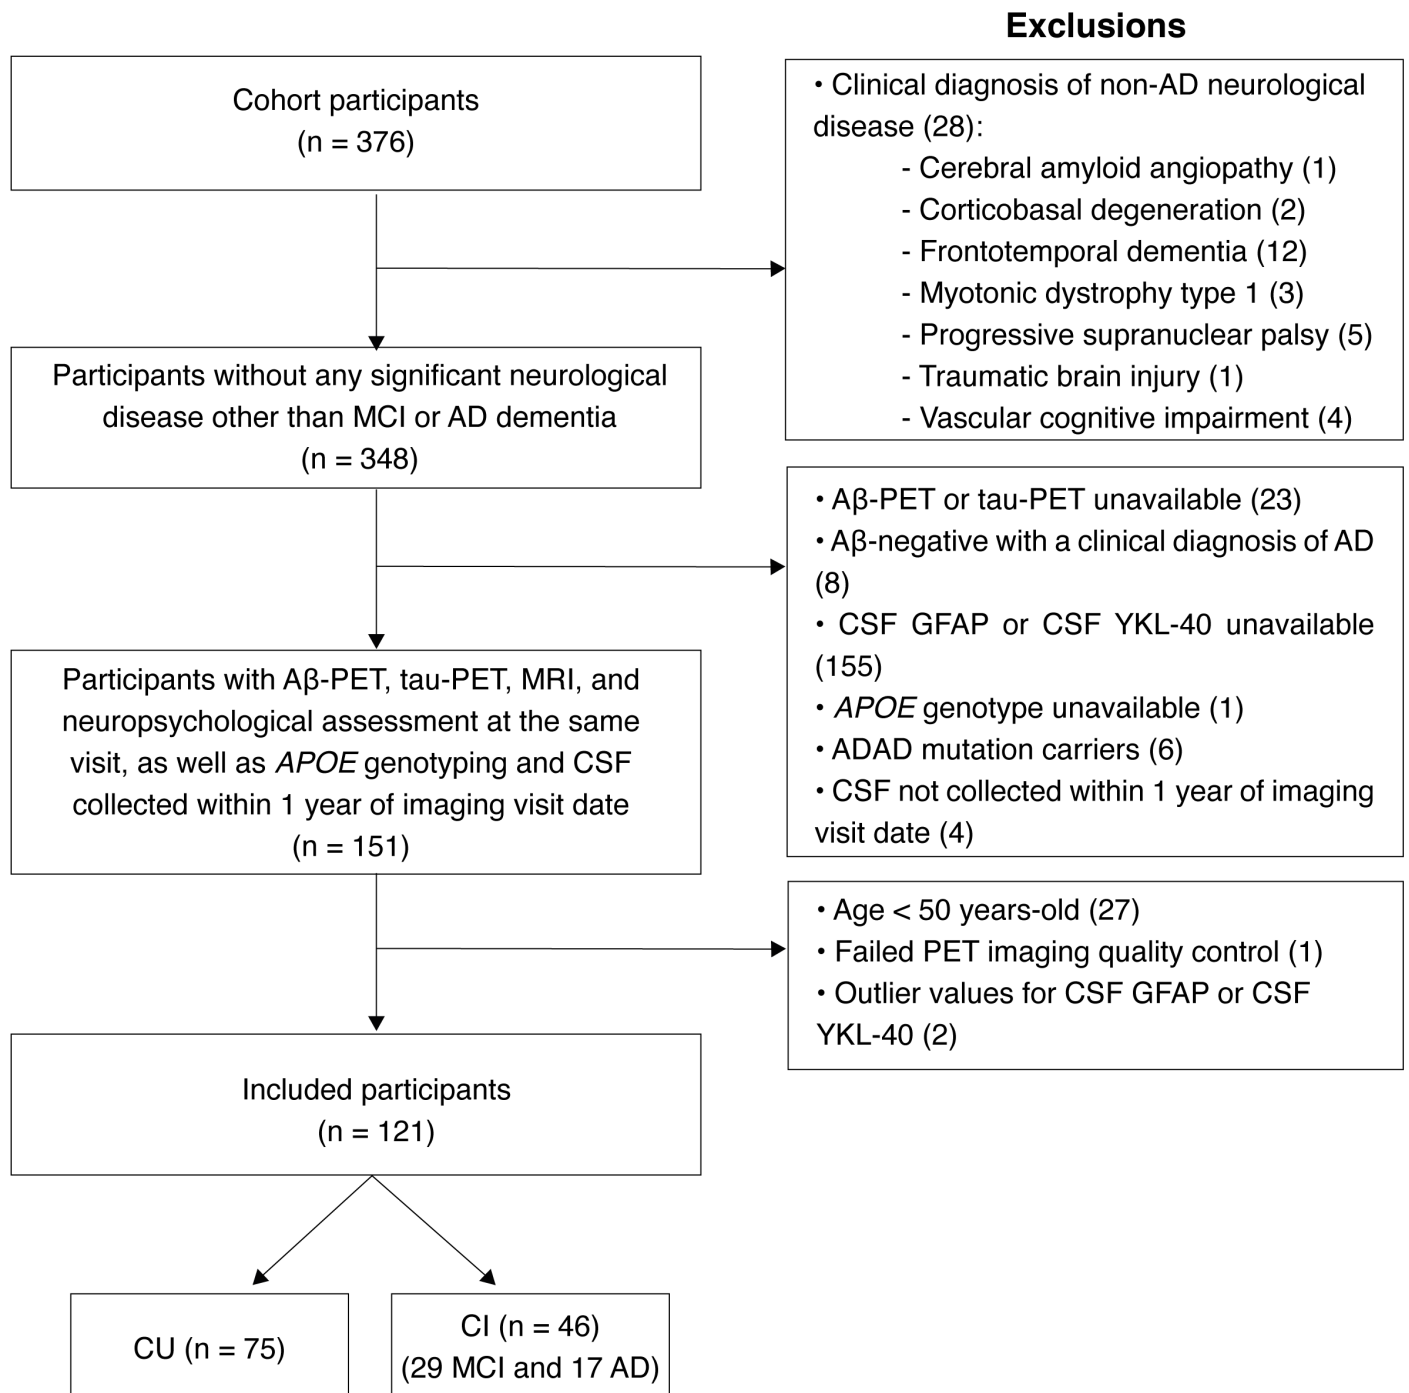

**Supplementary Figure 1. Flowchart of included participants.**

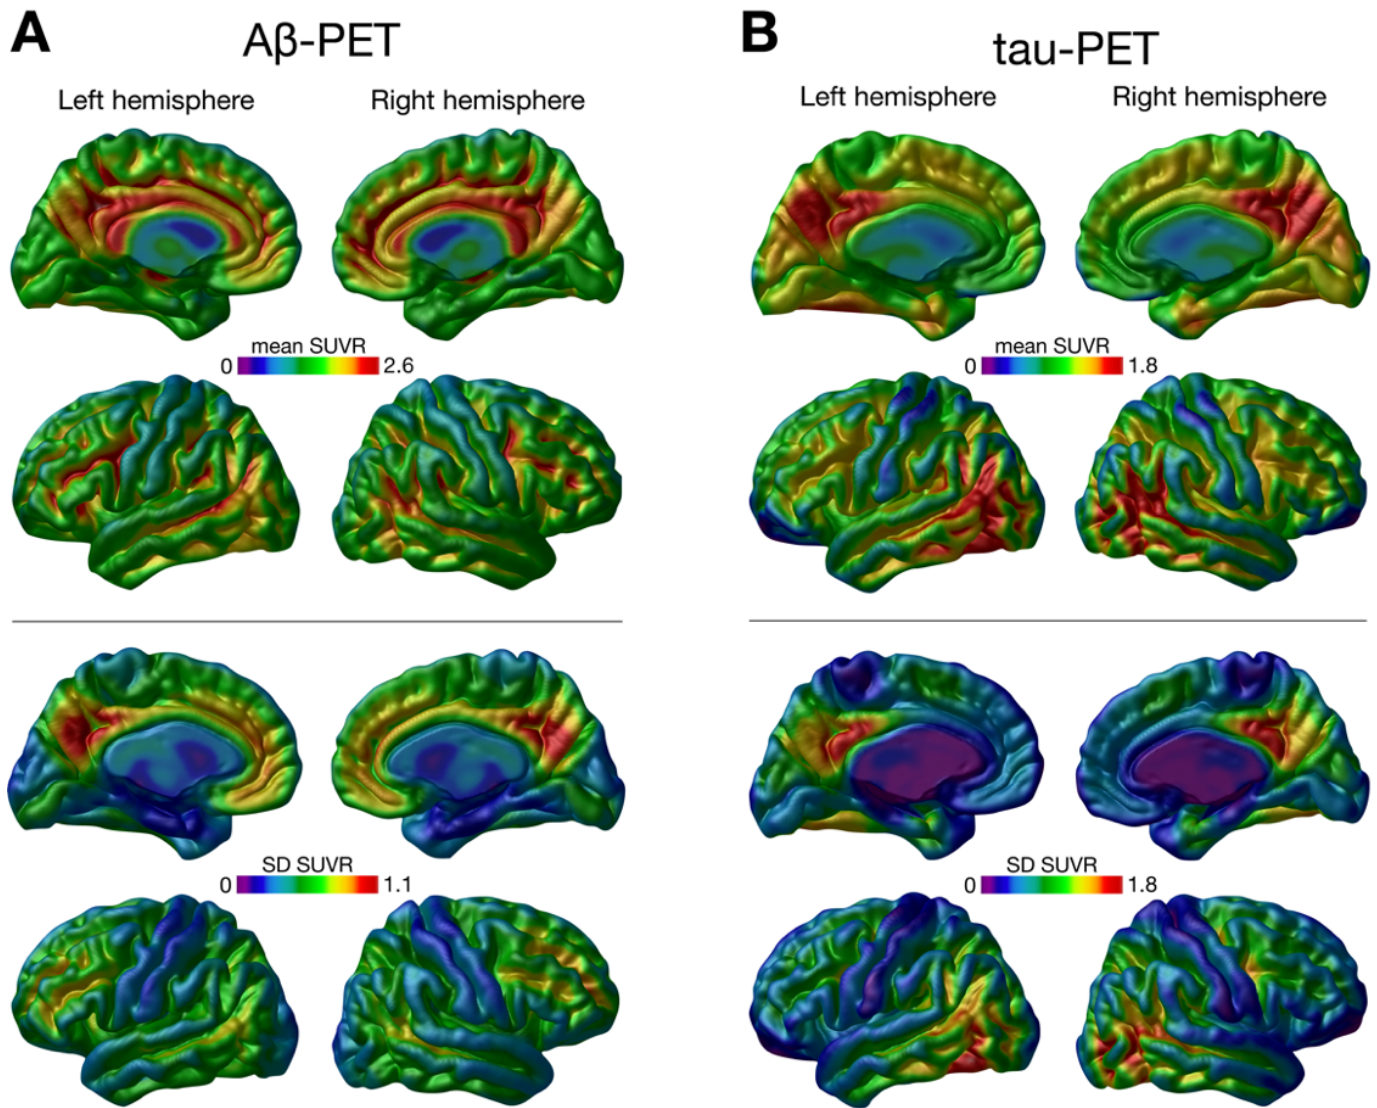

**Supplementary Figure 2.  $A\beta$ -PET and tau-PET SUVR average and SD maps.** Voxel-wise (A)  $A\beta$ -PET and (B) tau-PET SUVR mean (top) and SD (bottom) maps were calculated from the whole study population (75 CU, 29 with MCI, and 17 with AD dementia).

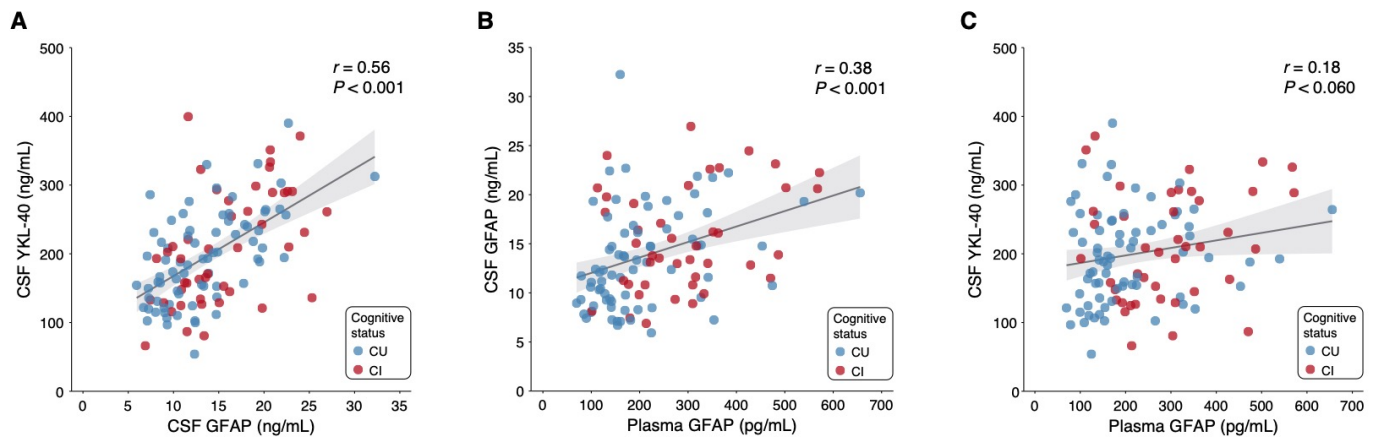

**Supplementary Figure 2. Correlation between reactive astrocyte biomarkers.** Scatter plot showing the results of Spearman's rank correlations between (A) CSF GFAP and CSF YKL-40, (B) plasma GFAP and CSF GFAP, and (C) plasma GFAP and CSF YKL-40. The error bands indicate the 95% confidence intervals. Individuals are colored by cognitive status. Noteworthy, analyses involving plasma GFAP were conducted in a subset of 114 individuals; from the total study population of 121 subjects, five participants did not have available plasma GFAP measures and two were excluded because they were considered outliers (plasma GFAP concentrations three SD above the mean of the population).

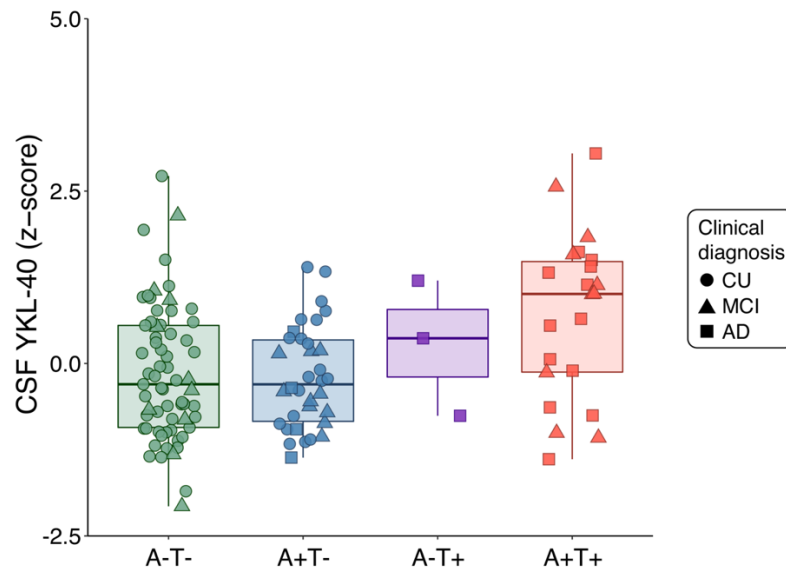

**Supplementary Figure 4. CSF YKL-40 levels across AT groups, including A-T+ individuals.** Box-and-whisker plot of CSF YKL-40 levels across AT groups. The horizontal line in each box represents the median; box ends represent the 25th and 75th percentiles. CSF YKL-40 levels were adjusted for age and sex; we could not adjust for *APOE*  $\epsilon 4$  status as 1 A-T+ individual did not have *APOE* genotype data available. Noteworthy, the 3 A-T+ individuals were not included in our analyses due to exclusion criteria defined *a priori* ( $A\beta$  negative subjects with a clinical diagnosis of AD dementia).

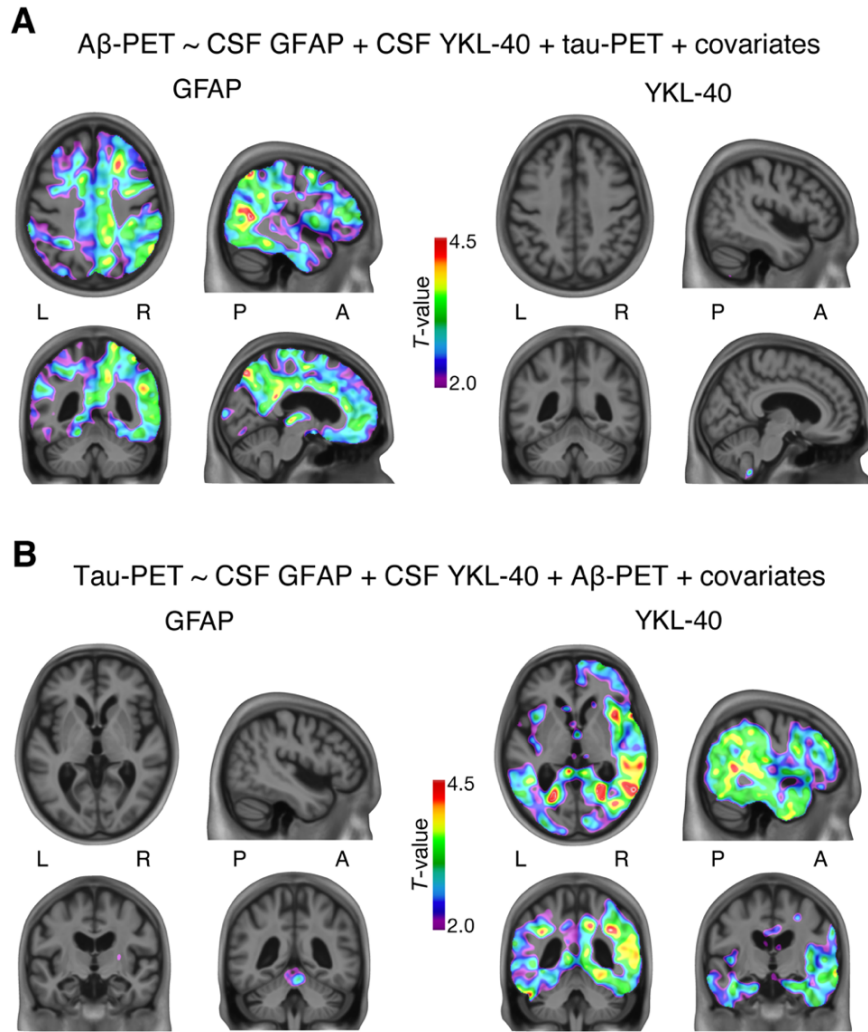

**Supplementary Figure 5. Voxel-wise linear regression results uncorrected for multiple comparisons correction.**

*T*-statistical parametric maps show the result of voxel-wise linear regression testing (A) the association of  $A\beta$ -PET SUVR with CSF GFAP and YKL-40 levels adjusting for tau-PET SUVR, and (B) the association of tau-PET SUVR with CSF GFAP and YKL-40 levels adjusting for neocortical  $A\beta$ -PET SUVR. R and L indicate right and left, respectively; A and P denote anterior and posterior, respectively. The results displayed are uncorrected for multiple comparisons correction. Although *T*-statistical parametric maps demonstrated that the relationships of CSF GFAP and YKL-40 with  $A\beta$ -PET and tau-PET, respectively, were stronger in the right hemisphere, we observed that the associations were present in both cerebral hemispheres.

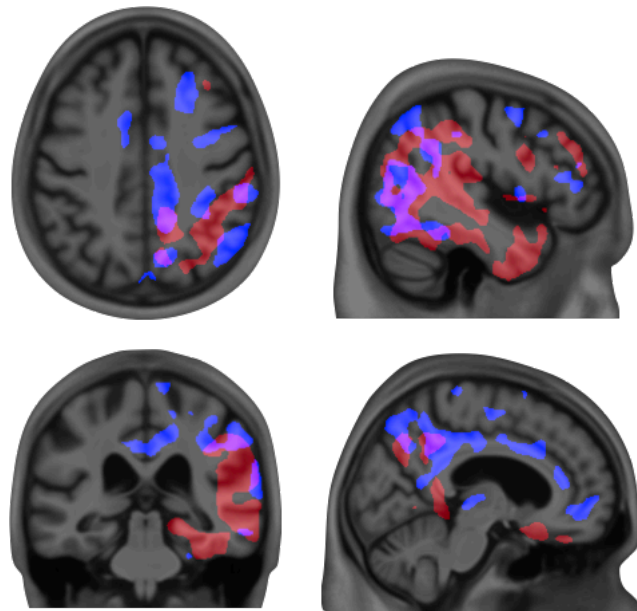

- Regions showing a significant association between Aβ-PET and GFAP
- Regions showing a significant association between tau-PET and YKL-40

**Supplementary Figure 6. Overlap between the regions showing a significant association of CSF GFAP and YKL-40 with Aβ-PET and tau-PET, respectively.** The figure depicts the overlap between the regions showing a significant association of CSF GFAP with Aβ-PET (blue) and of YKL-40 with tau-PET (red) from voxel-wise linear regressions. We observed that 78,270 voxels showed a significant association only between CSF GFAP and Aβ-PET, 134,862 voxels showed a significant association only between CSF YKL-40 and tau-PET, and 31,779 voxels showed an overlap between the clusters. The topographical overlap reflects 29% of the area showing an association between CSF GFAP and Aβ-PET and 19% of the area showing an association between CSF YKL- 40 and tau-PET.





**Supplementary Table 1. Time differences between imaging modalities.**

|                            | <b>Mean (SD) time<br/>difference, months</b> |
|----------------------------|----------------------------------------------|
| MRI and A $\beta$ -PET     | 1.04 (1.26)                                  |
| MRI and tau-PET            | 1.45 (1.98)                                  |
| A $\beta$ -PET and tau-PET | 1.43 (1.56)                                  |

**Supplementary Table 2. Analysis testing whether an interaction between A $\beta$ -PET and tau-PET values was differentially associated with the CDR score in the right and left cerebral hemispheres.**

|                                                                                                                 | Left hemisphere      |                 | Right hemisphere     |                 |
|-----------------------------------------------------------------------------------------------------------------|----------------------|-----------------|----------------------|-----------------|
|                                                                                                                 | Odds Ratio (95% CI)  | <i>P</i> -value | Odds Ratio (95% CI)  | <i>P</i> -value |
| <b>CDR ~ neocortical A<math>\beta</math>-PET SUVR x temporal meta-ROI tau-PET SUVR + covariates<sup>a</sup></b> |                      |                 |                      |                 |
| Neocortical A $\beta$ -PET SUVR                                                                                 | 1.69 (0.95 to 3.02)  | 0.074           | 1.75 (0.995 to 3.11) | 0.054           |
| Temporal meta-ROI tau-PET SUVR                                                                                  | 6.20 (2.34 to 19.28) | 0.001           | 7.29 (2.61 to 24.81) | < 0.001         |
| Neocortical A $\beta$ -PET SUVR x temporal meta-ROI tau-PET SUVR                                                | 0.65 (0.32 to 1.24)  | 0.190           | 0.79 (0.40 to 1.61)  | 0.491           |

Ordinal logistic regression demonstrated that the interaction between global neocortical A $\beta$ -PET and temporal meta-ROI tau-PET SUVR was not significantly associated with the CDR score in either cerebral hemisphere ( $P \geq 0.190$ ).

<sup>a</sup>Potential confounders included in the models as covariates are the following: age, sex, and *APOE*  $\epsilon$ 4 status.

**Supplementary Table 3. Analysis testing whether an interaction between A $\beta$ -PET and tau-PET values was differentially associated with memory and executive composite scores in the right and left cerebral hemispheres.**

|                                                                                                                                 | Left hemisphere        |                 | Right hemisphere       |                 |
|---------------------------------------------------------------------------------------------------------------------------------|------------------------|-----------------|------------------------|-----------------|
|                                                                                                                                 | $\beta$ (95% CI)       | <i>P</i> -value | $\beta$ (95% CI)       | <i>P</i> -value |
| <b>Memory composite ~ neocortical A<math>\beta</math>-PET SUVR x temporal meta-ROI tau-PET SUVR + covariates<sup>a</sup></b>    |                        |                 |                        |                 |
| Neocortical A $\beta$ -PET SUVR                                                                                                 | -0.23 (-0.51 to 0.03)  | 0.082           | -0.38 (-0.90 to 0.14)  | 0.148           |
| Temporal meta-ROI tau-PET SUVR                                                                                                  | -0.89 (-1.31 to -0.46) | < 0.001         | -1.43 (-2.08 to -0.78) | < 0.001         |
| Neocortical A $\beta$ -PET SUVR x temporal meta-ROI tau-PET SUVR                                                                | 0.03 (-0.27 to 0.33)   | 0.847           | 0.08 (-0.36 to 0.53)   | 0.717           |
| <b>Executive composite ~ neocortical A<math>\beta</math>-PET SUVR x temporal meta-ROI tau-PET SUVR + covariates<sup>a</sup></b> |                        |                 |                        |                 |
| Neocortical A $\beta$ -PET SUVR                                                                                                 | 0.15 (-0.09 to 0.38)   | 0.218           | 0.13 (-0.09 to 0.35)   | 0.256           |
| Temporal meta-ROI tau-PET SUVR                                                                                                  | -0.64 (-1.00 to -0.28) | < 0.001         | -0.64 (-0.99 to -0.28) | < 0.001         |
| Neocortical A $\beta$ -PET SUVR x temporal meta-ROI tau-PET SUVR                                                                | 0.02 (-0.23 to 0.27)   | 0.881           | -0.002 (-0.25 to 0.24) | 0.987           |

Linear regression models revealed that the interaction between global neocortical A $\beta$ -PET and temporal meta-ROI tau-PET SUVR was not significantly associated with memory and executive composite scores in either cerebral hemispheres ( $P \geq 0.717$ ).

<sup>a</sup>Potential confounders included in the models as covariates are the following: age, sex, and *APOE*  $\epsilon 4$  status.

**Supplementary Table 4. Associations of CSF GFAP and YKL-40 with neocortical A $\beta$ -PET and temporal meta-ROI tau-PET.**

|                                                                                                                                                        | $\beta$ (95% confidence interval) | <i>T</i> -value | <i>P</i> -value |
|--------------------------------------------------------------------------------------------------------------------------------------------------------|-----------------------------------|-----------------|-----------------|
| <b>Model A<sup>a</sup>: neocortical A<math>\beta</math>-PET SUVR ~ CSF GFAP + CSF YKL-40 + temporal meta-ROI tau-PET SUVR + covariates<sup>c</sup></b> |                                   |                 |                 |
| CSF GFAP                                                                                                                                               | 0.24 (0.08 to 0.40)               | 3.03            | 0.003           |
| CSF YKL-40                                                                                                                                             | -0.14 (-0.30 to 0.03)             | -1.66           | 0.100           |
| Temporal meta-ROI tau-PET SUVR                                                                                                                         | 0.53 (0.33 to 0.72)               | 5.38            | < 0.001         |
| <b>Model B<sup>b</sup>: temporal meta-ROI tau-PET SUVR ~ CSF GFAP + CSF YKL-40 + neocortical A<math>\beta</math>-PET SUVR + covariates<sup>c</sup></b> |                                   |                 |                 |
| CSF GFAP                                                                                                                                               | -0.08 (-0.22 to 0.06)             | -1.17           | 0.244           |
| CSF YKL-40                                                                                                                                             | 0.24 (0.11 to 0.37)               | 3.55            | < 0.001         |
| Neocortical A $\beta$ -PET SUVR                                                                                                                        | 0.39 (0.24 to 0.53)               | 5.38            | < 0.001         |

<sup>a</sup>Adjusted  $R^2$ : 0.51. <sup>b</sup>Adjusted  $R^2$ : 0.64. <sup>c</sup>Potential confounders included in the models as covariates are the following: age, sex, cognitive status, and *APOE*  $\epsilon$ 4 status.

**Supplementary Table 5. Sensitivity analyses testing the associations of A $\beta$ -PET and tau-PET with reactive astrocyte biomarkers excluding individuals with a time lag higher than 3 months between imaging and CSF collection.**

|                                                                                                                                                        | $\beta$ (95% confidence interval) | <i>T</i> -value | <i>P</i> -value |
|--------------------------------------------------------------------------------------------------------------------------------------------------------|-----------------------------------|-----------------|-----------------|
| <b>Model A<sup>a</sup>: neocortical A<math>\beta</math>-PET SUVR ~ CSF GFAP + CSF YKL-40 + temporal meta-ROI tau-PET SUVR + covariates<sup>c</sup></b> |                                   |                 |                 |
| CSF GFAP                                                                                                                                               | 0.27 (0.05 to 0.49)               | 2.46            | 0.016           |
| CSF YKL-40                                                                                                                                             | -0.17 (-0.40 to 0.07)             | -1.37           | 0.173           |
| Temporal meta-ROI tau-PET SUVR                                                                                                                         | 0.58 (0.32 to 0.84)               | 4.44            | < 0.001         |
| <b>Model B<sup>b</sup>: temporal meta-ROI tau-PET SUVR ~ CSF GFAP + CSF YKL-40 + neocortical A<math>\beta</math>-PET SUVR + covariates<sup>c</sup></b> |                                   |                 |                 |
| CSF GFAP                                                                                                                                               | -0.17 (-0.35 to 0.01)             | -1.90           | 0.061           |
| CSF YKL-40                                                                                                                                             | 0.33 (0.15 to 0.50)               | 3.69            | < 0.001         |
| Neocortical A $\beta$ -PET SUVR                                                                                                                        | 0.36 (0.20 to 0.52)               | 4.44            | < 0.001         |

<sup>a</sup>Adjusted R<sup>2</sup>: 0.48. <sup>b</sup>Adjusted R<sup>2</sup>: 0.65. <sup>c</sup>Potential confounders included in the models as covariates are the following: age, sex, cognitive status, and *APOE*  $\epsilon$ 4 status.

**Supplementary Table 6. Structural equation model coefficients and associated statistics for Figure 3A.**

|                                       | <b>β (95% confidence interval)</b> | <b>P-value</b> |
|---------------------------------------|------------------------------------|----------------|
| <b>MMSE</b>                           |                                    |                |
| Hippocampal volume                    | 0.28 (0.12 to 0.43)                | 0.001          |
| Temporal meta-ROI tau-PET SUVR        | -0.48 (-0.68 to -0.28)             | < 0.001        |
| Neocortical Aβ-PET SUVR               | 0.04 (-0.14 to 0.21)               | 0.690          |
| CSF GFAP                              | -0.02 (-0.16 to 0.12)              | 0.762          |
| <b>Hippocampal volume</b>             |                                    |                |
| Temporal meta-ROI tau-PET SUVR        | -0.46 (-0.68 to -0.24)             | < 0.001        |
| Neocortical Aβ-PET SUVR               | -0.03 (-0.23 to 0.17)              | 0.783          |
| CSF GFAP                              | -0.16 (-0.32 to -0.003)            | 0.046          |
| <b>CSF GFAP</b>                       |                                    |                |
| Temporal meta-ROI tau-PET SUVR        | 0.11 (-0.13 to 0.36)               | 0.361          |
| Neocortical Aβ-PET SUVR               | 0.30 (0.09 to 0.52)                | 0.007          |
| <b>Temporal meta-ROI tau-PET SUVR</b> |                                    |                |
| Neocortical Aβ-PET SUVR               | 0.58 (0.45 to 0.70)                | < 0.001        |

All associations were adjusted for age, *APOE* ε4 status, and years of education.

**Supplementary Table 7. Structural equation model coefficients and associated statistics for Figure 3B.**

|                                       | <b><math>\beta</math> (95% confidence interval)</b> | <b><i>P</i>-value</b> |
|---------------------------------------|-----------------------------------------------------|-----------------------|
| <b>MMSE</b>                           |                                                     |                       |
| Hippocampal volume                    | 0.30 (0.15 to 0.46)                                 | < 0.001               |
| Temporal meta-ROI tau-PET SUVR        | -0.51 (-0.72 to -0.31)                              | < 0.001               |
| Neocortical A $\beta$ -PET SUVR       | 0.03 (-0.14 to 0.20)                                | 0.706                 |
| CSF YKL-40                            | 0.09 (-0.05 to 0.23)                                | 0.198                 |
| <b>Hippocampal volume</b>             |                                                     |                       |
| Temporal meta-ROI tau-PET SUVR        | -0.41 (-0.63 to -0.18)                              | < 0.001               |
| Neocortical A $\beta$ -PET SUVR       | -0.08 (-0.27 to 0.11)                               | 0.418                 |
| CSF YKL-40                            | -0.17 (-0.33 to -0.01)                              | 0.041                 |
| <b>CSF YKL-40</b>                     |                                                     |                       |
| Temporal meta-ROI tau-PET SUVR        | 0.44 (0.20 to 0.67)                                 | < 0.001               |
| Neocortical A $\beta$ -PET SUVR       | -0.02 (-0.24 to 0.20)                               | 0.855                 |
| <b>Temporal meta-ROI tau-PET SUVR</b> |                                                     |                       |
| Neocortical A $\beta$ -PET SUVR       | 0.58 (0.45 to 0.70)                                 | < 0.001               |

All associations were adjusted for age, *APOE*  $\epsilon$ 4 status, and years of education.



**Supplementary Table 8. Abbreviations of inflammation-related proteins.**

| <b>Protein symbol</b> | <b>Protein name</b>                                           |
|-----------------------|---------------------------------------------------------------|
| 4E-BP1                | Eukaryotic translation initiation factor 4E-binding protein 1 |
| ADA                   | Adenosine Deaminase                                           |
| CCL11                 | C-X-C motif chemokine 11                                      |
| CCL19                 | C-C motif chemokine 19                                        |
| CCL23                 | C-C motif chemokine 23                                        |
| CCL25                 | C-C motif chemokine 25                                        |
| CCL3                  | C-C motif chemokine 3                                         |
| CCL4                  | C-C motif chemokine 4                                         |
| CD244                 | Natural killer cell receptor 2B4                              |
| CD40                  | CD40L receptor                                                |
| CD5                   | T-cell surface glycoprotein CD5                               |
| CD8A                  | T-cell surface glycoprotein CD8 alpha chain                   |
| CDCP1                 | CUB domain-containing protein 1                               |
| CSF-1                 | Macrophage colony-stimulating factor 1                        |
| CST5                  | Cystatin D                                                    |
| CX3CL1                | Fractalkine                                                   |
| CXCL1                 | C-X-C motif chemokine 1                                       |
| CXCL10                | C-X-C motif chemokine 10                                      |
| CXCL11                | C-X-C motif chemokine 11                                      |
| CXCL5                 | C-X-C motif chemokine 5                                       |
| CXCL6                 | C-X-C motif chemokine 6                                       |
| CXCL9                 | C-X-C motif chemokine 9                                       |
| DNER                  | Delta and Notch-like epidermal growth factor-related receptor |
| FGF-19                | Fibroblast growth factor 19                                   |
| FGF-5                 | Fibroblast growth factor 5                                    |
| Flt3L                 | FMS-related tyrosine kinase 3 ligand                          |
| HGF                   | Hepatocyte growth factor                                      |
| IL-10RB               | Interleukin-10 receptor subunit beta                          |

|                |                                                              |
|----------------|--------------------------------------------------------------|
| IL-12B         | Interleukin-12 subunit beta                                  |
| IL-18          | Interleukin-18                                               |
| IL-18R1        | Interleukin-18 receptor 1                                    |
| IL-6           | Interleukin-6                                                |
| IL-7           | Interleukin-7                                                |
| IL-8           | Interleukin-8                                                |
| LAP TGF-beta-1 | Latency-associated peptide transforming growth factor beta-1 |
| LIF            | Leukemia inhibitory factor                                   |
| LIF-R          | Leukemia inhibitory factor receptor                          |
| MCP-1          | Monocyte chemotactic protein 1                               |
| MCP-2          | Monocyte chemotactic protein 2                               |
| MCP-4          | Monocyte chemotactic protein 4                               |
| MMP-1          | Matrix metalloproteinase-1                                   |
| MMP-10         | Matrix metalloproteinase-10                                  |
| OPG            | Osteoprotegerin                                              |
| PD-L1          | Programmed cell death 1 ligand 1                             |
| SCF            | Stem cell factor                                             |
| SIRT2          | SIR2-like protein 2                                          |
| STAMBP         | STAM-binding protein                                         |
| TGF-alpha      | Transforming growth factor alpha                             |
| TNF-beta       | TNF-beta                                                     |
| TNFRSF9        | Tumor necrosis factor receptor superfamily member 9          |
| TNFSF14        | Tumor necrosis factor ligand superfamily member 14           |
| TRAIL          | TNF-related apoptosis-inducing ligand                        |
| TWEAK          | Tumor necrosis factor ligand superfamily, member 12          |
| uPA            | Urokinase-type plasminogen activator                         |
| VEGF-A         | Vascular endothelial growth factor A                         |

**Supplementary Table 9. Demographics of the subset of individuals with available CSF inflammation-related proteins.**

|                                     | <b>CU</b>               | <b>CI</b>               | <b><i>P</i>-value</b> |
|-------------------------------------|-------------------------|-------------------------|-----------------------|
| No.                                 | 36                      | 26                      | -                     |
| Age, years                          | 71.6 (6.1)              | 69.6 (7.9)              | 0.296                 |
| Male, No. (%)                       | 9 (25.0)                | 16 (61.5)               | 0.008                 |
| Education, years                    | 14.5 (3.5)              | 15.6 (2.8)              | 0.174                 |
| <i>APOE</i> ε4 carriers, No. (%)    | 11 (30.6)               | 16 (61.5)               | 0.030                 |
| MMSE score                          | 29.2 (1.1)              | 26.6 (3.9)              | 0.002                 |
| Neocortical Aβ-PET SUVR             | 1.62 (0.5)              | 2.30 (0.5)              | < 0.001               |
| Temporal meta-ROI tau-PET SUVR      | 0.87 (0.1)              | 1.54 (0.7)              | < 0.001               |
| Hippocampal volume, cm <sup>3</sup> | 3.53 (0.3) <sup>a</sup> | 3.24 (0.4) <sup>a</sup> | 0.004                 |

Continuous variables are presented as mean (SD).

<sup>a</sup>Values reported are adjusted for total intracranial volume.

**Supplementary Table 10. Comparison of demographic information between the whole sample and the subsample with available CSF inflammation-related proteins.**

|                                     | Whole sample            | Subsample with available CSF inflammatory markers | <i>P</i> -value |
|-------------------------------------|-------------------------|---------------------------------------------------|-----------------|
| No.                                 | 121                     | 62                                                | -               |
| Age, years                          | 70.2 (6.6)              | 70.8 (6.9)                                        | 0.569           |
| Male, No. (%)                       | 53 (43.8)               | 25 (40.3)                                         | 0.770           |
| Education, years                    | 14.9 (3.3)              | 15.0 (3.2)                                        | 0.934           |
| Clinical diagnosis, No. (%)         |                         |                                                   |                 |
| CU                                  | 75 (62.0)               | 36 (58.1)                                         | 0.859           |
| MCI                                 | 29 (24.0)               | 17 (27.4)                                         |                 |
| AD                                  | 17 (14.0)               | 9 (14.5)                                          |                 |
| <i>APOE</i> ε4 carriers, No. (%)    | 48 (39.7)               | 27 (43.5)                                         | 0.729           |
| MMSE score                          | 27.6 (3.9)              | 28.1 (2.9)                                        | 0.352           |
| Neocortical Aβ-PET SUVR             | 1.77 (0.6)              | 1.90 (0.6)                                        | 0.167           |
| Temporal meta-ROI tau-PET SUVR      | 1.14 (0.6)              | 1.15 (0.6)                                        | 0.874           |
| Hippocampal volume, cm <sup>3</sup> | 3.39 (0.4) <sup>a</sup> | 3.41 (0.4) <sup>a</sup>                           | 0.787           |

Continuous variables are presented as mean (SD).

<sup>a</sup>Values reported are adjusted for total intracranial volume.

## Supplementary References

1. Ashburner J. A fast diffeomorphic image registration algorithm. *Neuroimage*. 2007;38(1):95-113.
2. Ashburner J, Friston KJ. Voxel-based morphometry--the methods. *Neuroimage*. 2000;11(6 Pt 1):805-21.
3. Pascoal TA, Shin M, Kang MS, Chamoun M, Chartrand D, Mathotaarachchi S, et al. In vivo quantification of neurofibrillary tangles with [(18)F]MK-6240. *Alzheimers Res Ther*. 2018;10(1):74.
4. Cselenyi Z, Jonhagen ME, Forsberg A, Halldin C, Julin P, Schou M, et al. Clinical validation of 18F-AZD4694, an amyloid-beta-specific PET radioligand. *J Nucl Med*. 2012;53(3):415-24.
5. Pascoal TA, Therriault J, Benedet AL, Savard M, Lussier FZ, Chamoun M, et al. 18F-MK-6240 PET for early and late detection of neurofibrillary tangles. *Brain*. 2020;143(9):2818-30.
